# Supplementary material
Source: Springer Nature journal article supplement (https://www.springermedizin.de/resource/supplementary/12936_2008_838_MOESM4_ESM.pdf/9549056)

A

## Pfcrt K76T - CQ - D14

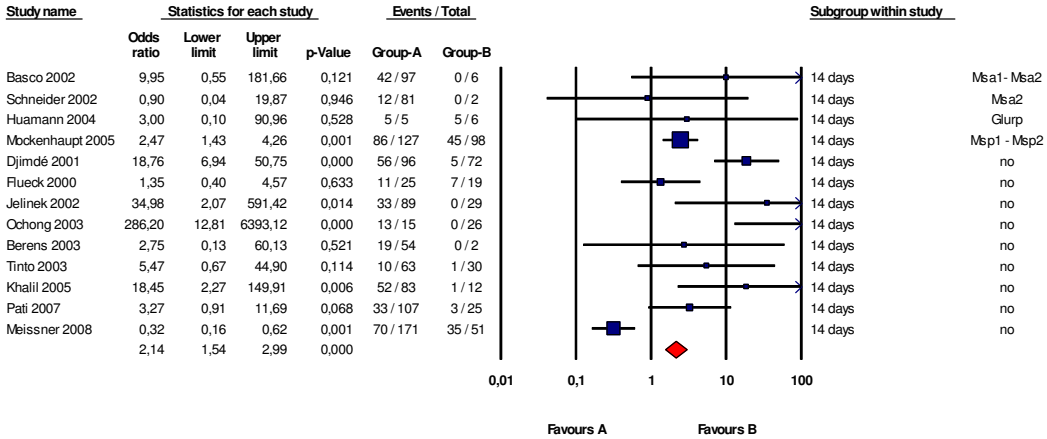

### Meta Analysis

B

## Pfcrt K76T - CQ - D28

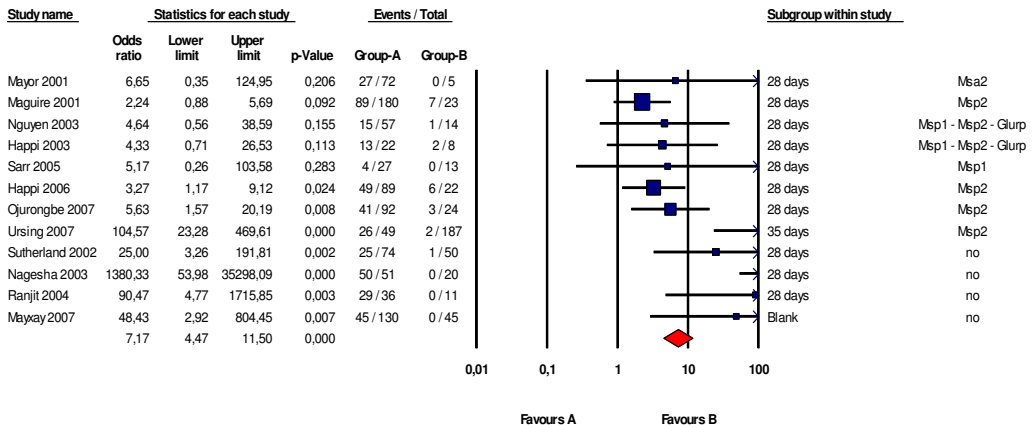

### Meta Analysis

Supplement: MOESM4 [file 9549056]
